# Supplementary material for: Cell Adhesion Molecules in Schizophrenia Patients with Metabolic Syndrome
Source: MDPI journal article supplement (doi:10.3390/metabo13030376), 2023-03-02
Supplement: s1 [file s1]

Table S1. Determinants of CAMs concentrations in multiple regression analysis with age, duration of illness and BMI as an independent variable.

| Variable                   | B      | p-Value | adjusted R <sup>2</sup> |
|----------------------------|--------|---------|-------------------------|
| <i>sICAM-1</i>             |        |         |                         |
| Age, years                 | -0.023 | 0.836   | -0.016                  |
| Duration of illness, years | -0.012 | 0.912   |                         |
| BMI,kg/m2                  | 0.023  | 0.769   |                         |
| <i>NCAM</i>                |        |         |                         |
| Age, years                 | -0.140 | 0.197   | 0.008                   |
| Duration of illness, years | 0.005  | 0.964   |                         |
| BMI,kg/m2                  | -0.062 | 0.426   |                         |
| <i>sVCAM-1</i>             |        |         |                         |
| Age, years                 | 0.076  | 0.488   | -0.012                  |
| Duration of illness, years | -0.054 | 0.636   |                         |
| BMI, kg/m2                 | -0.045 | 0.574   |                         |

Notes: BMI – body mass index; sICAM-1 – soluble intercellular adhesion molecule-1; sNCAM – soluble neural cell adhesion molecule; sVCAM-1 – soluble vascular cell adhesion molecule-1;

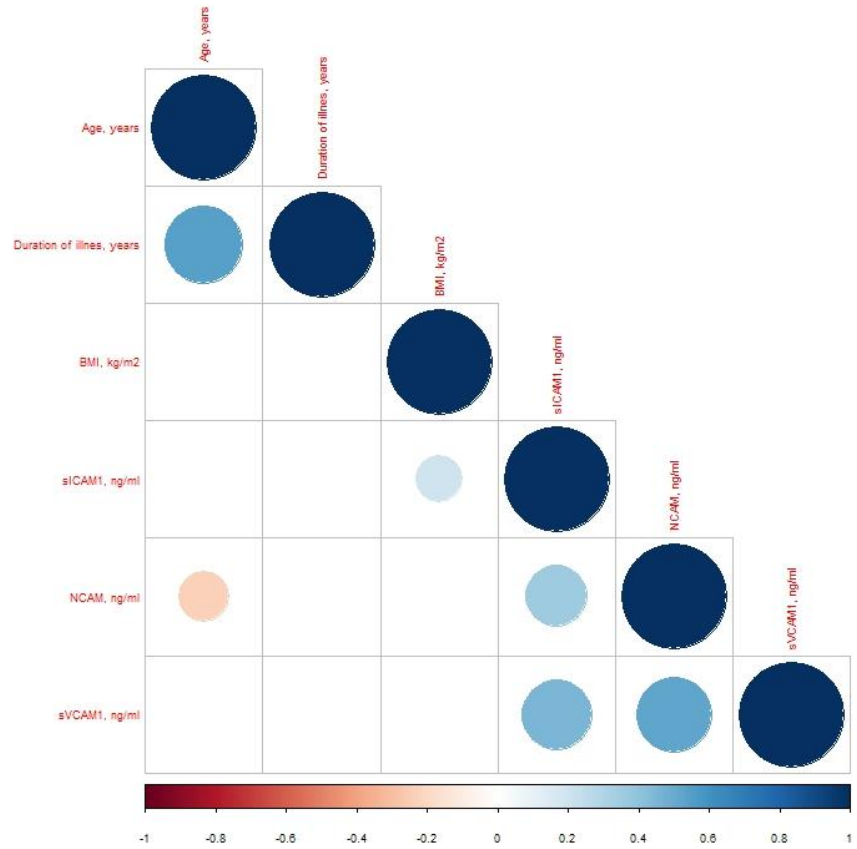

Figure S1. The correlation between cell adhesion molecules, age, duration of schizophrenia and BMI in patients without metabolic syndrome.

Note: The circles in the figure reflect only statistically significant correlations. Red and blue circles mean negative and positive correlations, respectively; the size and color intensity of circles are proportional to the correlation coefficient; in the bottom, the legend of color intensity shows the rate of correlations and the corresponding relations

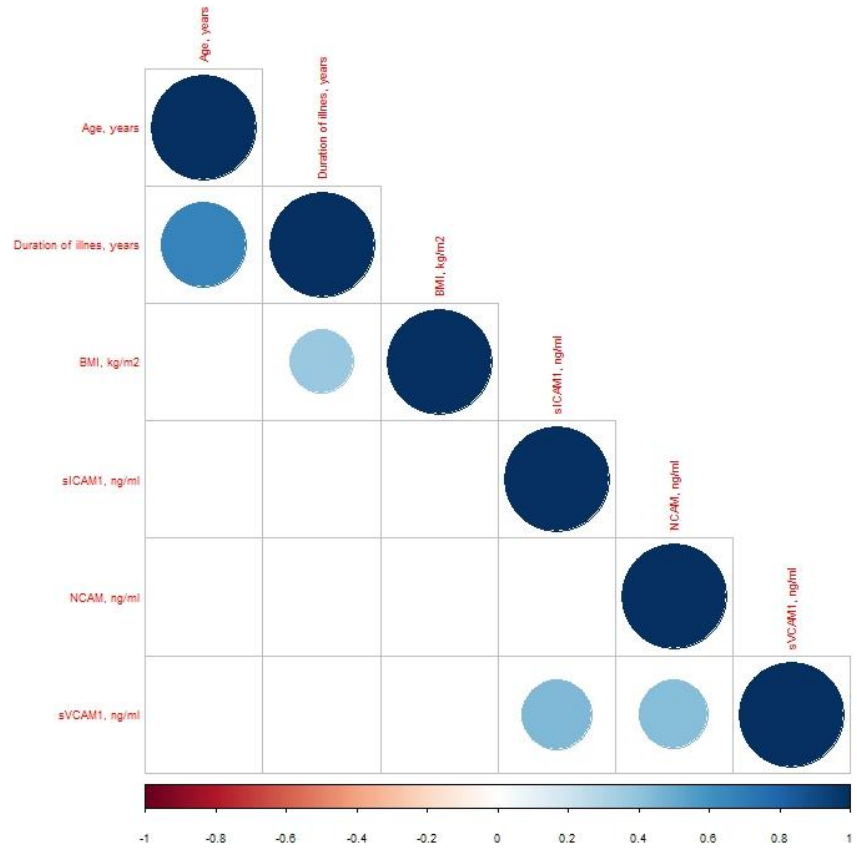

Figure S2. The correlation between cell adhesion molecules, age, duration of schizophrenia and BMI in patients with metabolic syndrome.

Note: The circles in the figure reflect only statistically significant correlations. Red and blue circles mean negative and positive correlations, respectively; the size and color intensity of circles are proportional to the correlation coefficient; in the bottom, the legend of color intensity shows the rate of correlations and the corresponding relations
